# Supplementary material
Source: PubMed Central journal article supplement (PMC6014512)

Figure S1 Propensity score distribution between matched and unmatched units

### Distribution of Propensity Scores

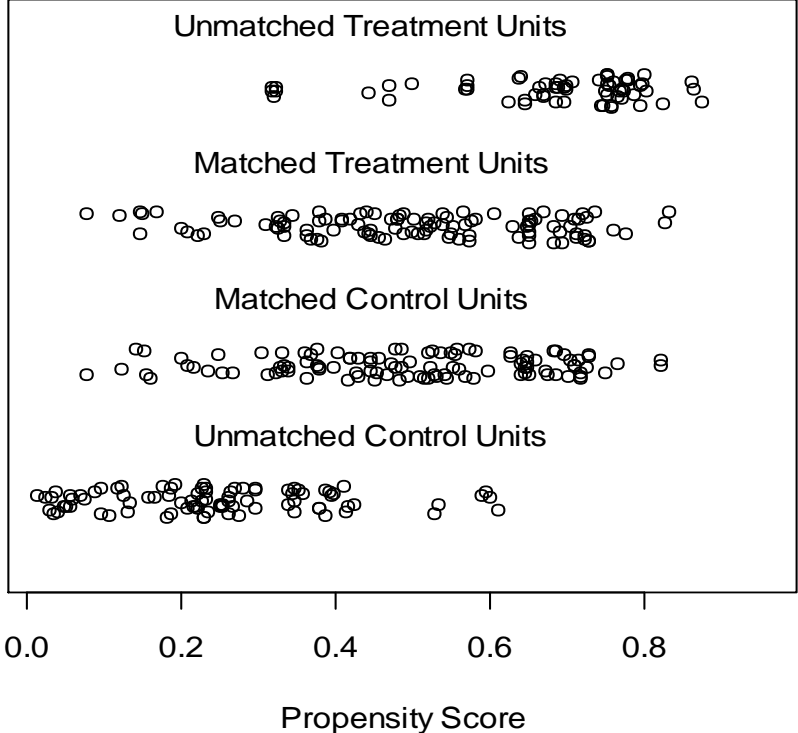

**Figure S2** Histogram of propensity score before and after matching

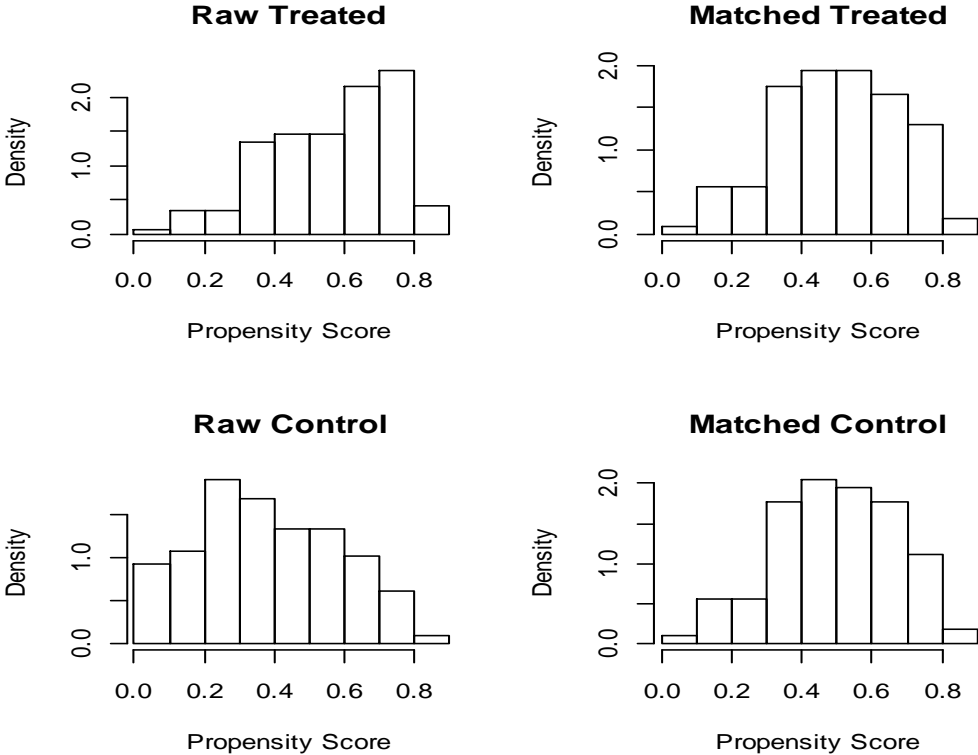

Supplement: IRNF_A_1244072_SM0185.pdf [file IRNF_A_1244072_SM0185.pdf]
